# Supplementary material for: Development of a radiolabeled caninized anti-EGFR antibody for comparative oncology trials
Source: PubMed Central journal article supplement (PMC5669955; doi:10.18632/oncotarget.20914), 2017-09-15
Supplement: oncotarget-08-83128-s001.pdf [file oncotarget-08-83128-s001.pdf]

## Development of a radiolabeled caninized anti-EGFR antibody for comparative oncology trials

### SUPPLEMENTARY MATERIALS

#### Expression of recombinant canine EGFR

HEK293T cells were obtained from the American Type Culture Collection (293T (ATCC® CRL3216™)) and cultured in Dulbecco's Modified Eagle Medium (cat# 11995065, Gibco), supplemented with 10% fetal bovine serum (cat# 10270106, Gibco), 2 mM Glutamine (cat# 25030081, Gibco), 100 U/ml penicillin and 100 µg/ml Streptomycin (cat# 15140122, Gibco) under humidified conditions (37°C, 5% CO<sub>2</sub>). The codon optimized coding sequence of recombinant soluble canine EGFR (NCBI ref. seq. XP\_533073.3, amino acids 1-618) was cloned into the pBudCE4.1 vector (cat# V53220, Invitrogen) under the EF-1α promoter using the NotI and KpnI restriction sites, including a 6xHIS tag. The complete DNA sequence is disclosed in Supplementary Table 1. Selection pressure was maintained using 100 µg/ml Zeocin™ (cat# R25001, Gibco). Clones were screened for productivity in a sandwich ELISA using cetuximab (Erbix®<sup>®</sup>, Merck) as capture antibody at 1 µg/ml, and a

horseradish-peroxidase labeled Penta-HIS antibody (cat# 34460, Qiagen) at a 2000-fold dilution as a detection antibody. The best producing clone was then expanded in T-flasks and supernatant was collected in 5 day intervals. Binding/washing buffer (50 mM NaH<sub>2</sub>PO<sub>4</sub>, 500 mM NaCl, 0,05% Tween-20, pH 8.0) was mixed with the supernatant in a 1:2 ratio and subsequently loaded on a Ni sepharose HisTrap excel column (cat# 29-0485-86, GE Healthcare) at a constant flow rate of 1 ml/min. The column was then washed beads were washed with 20 column volumes of washing buffer (50 mM NaH<sub>2</sub>PO<sub>4</sub>, 500 mM NaCl, 10 mM imidazole, 0,05% Tween-20, pH 8.0). Bound canine EGFR was eluted with a constantly increasing concentration of elution buffer (50 mM NaH<sub>2</sub>PO<sub>4</sub>, 500 mM NaCl, 500 mM imidazole, 0,05% Tween-20, pH 8.0) and collected in 1ml fractions. Fractions containing canine EGFR were enriched using 30 kDa cut-off Amicon ultrafiltration tubes (cat# UFC903008, Millipore) combined with a buffer exchange against PBS, pH 7.4.

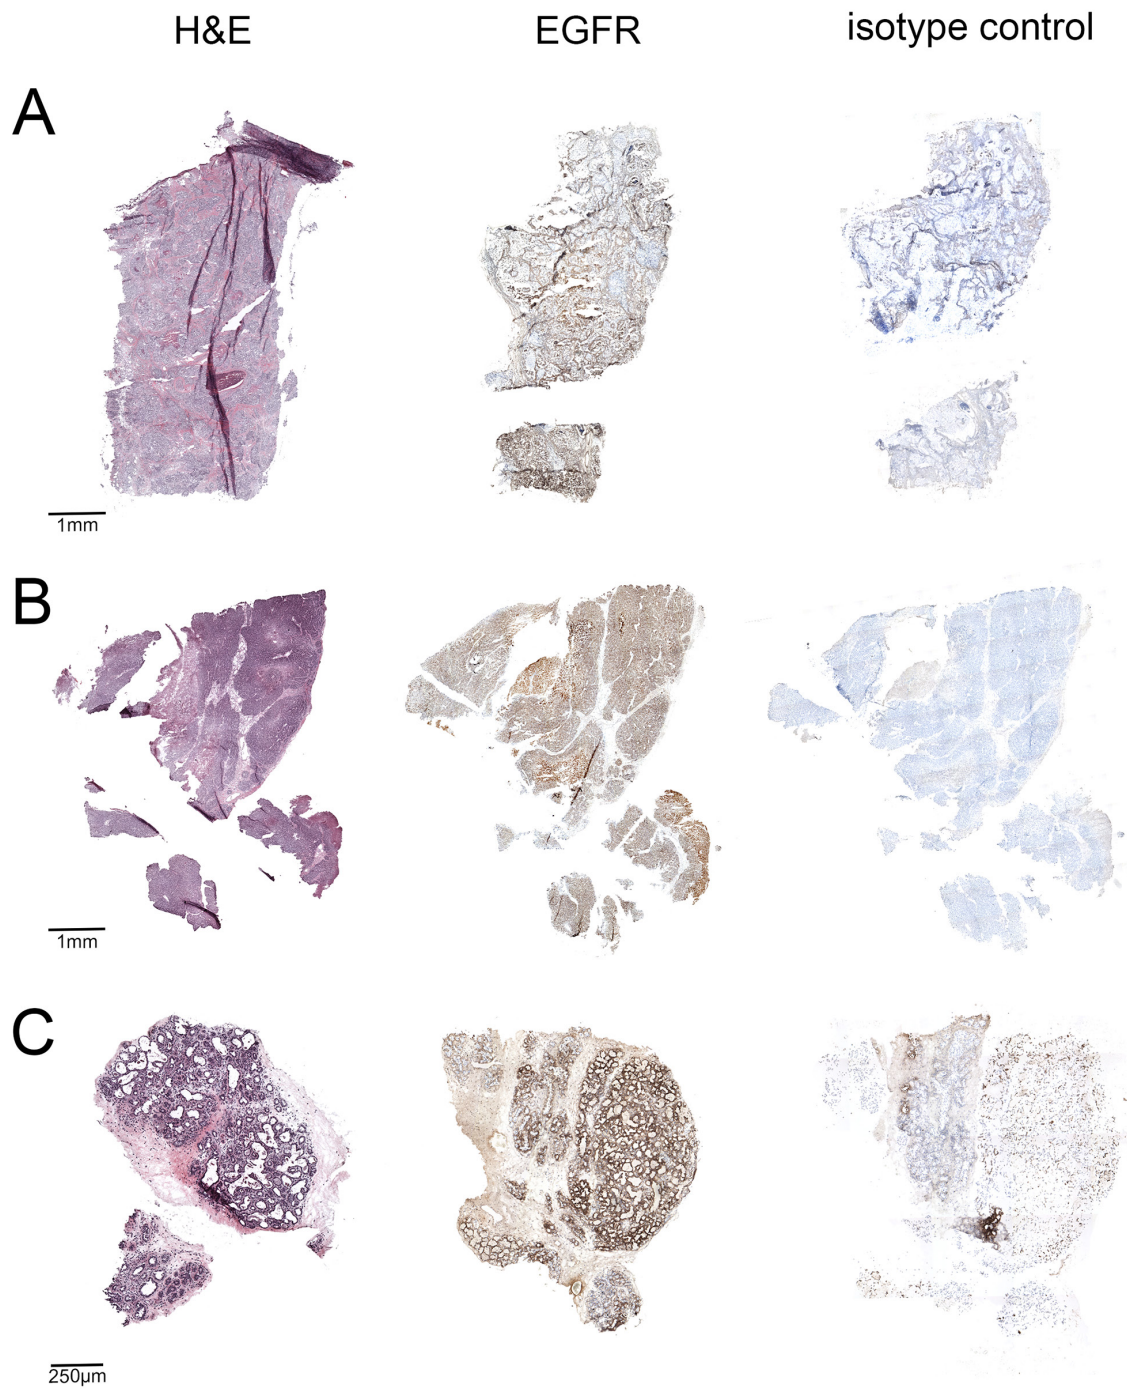

**Supplementary Figure 1: EGFR+ canine mammary carcinoma sections with isotype control.** Immunohistochemical staining of the tissue sections shown in Figure 4 of the main manuscript, including the isotype controls corresponding to the slides with EGFR staining. (A-C) refer to sections from the same patients as shown in Figure 3, patients' characteristics can be found in Supplementary Table 2.

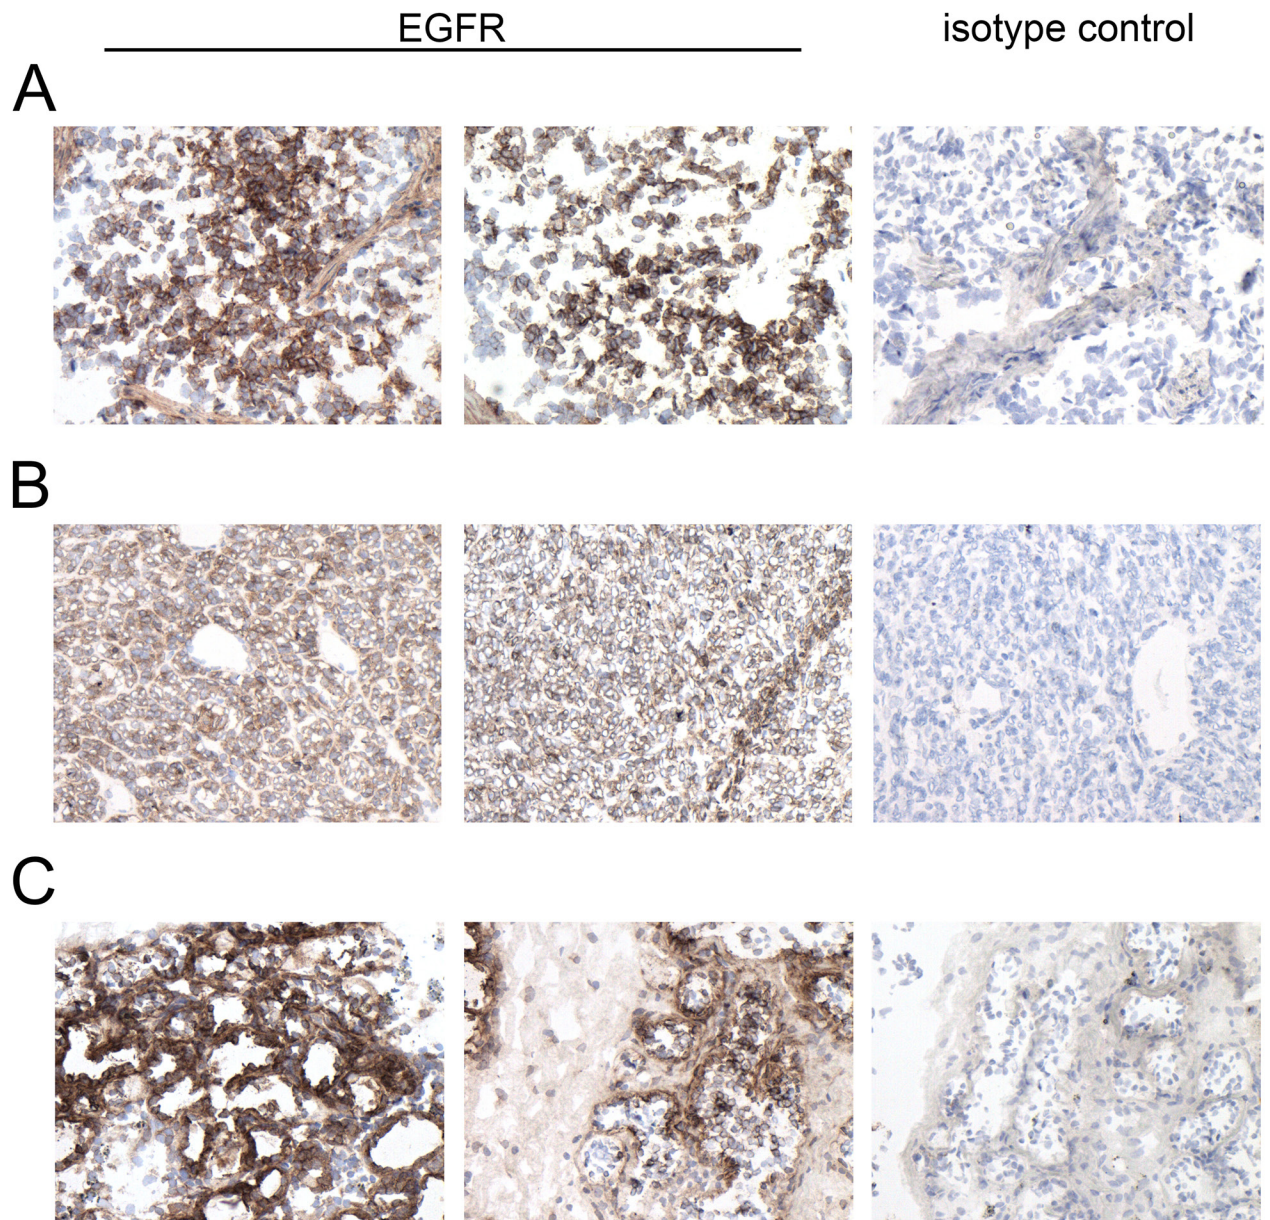

**Supplementary Figure 2: EGFR+ canine mammary carcinoma sections, 20x magnification.** Immunohistochemical staining of the tissue sections shown in Figure 4 of the main manuscript, 20x magnification. (A-C) refer to sections from the same patients as shown in Figure 3, patients' characteristics can be found in Supplementary Table 2.

1.

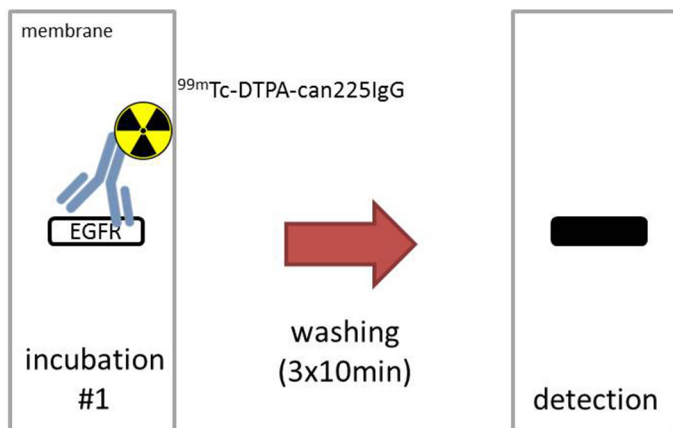

2.

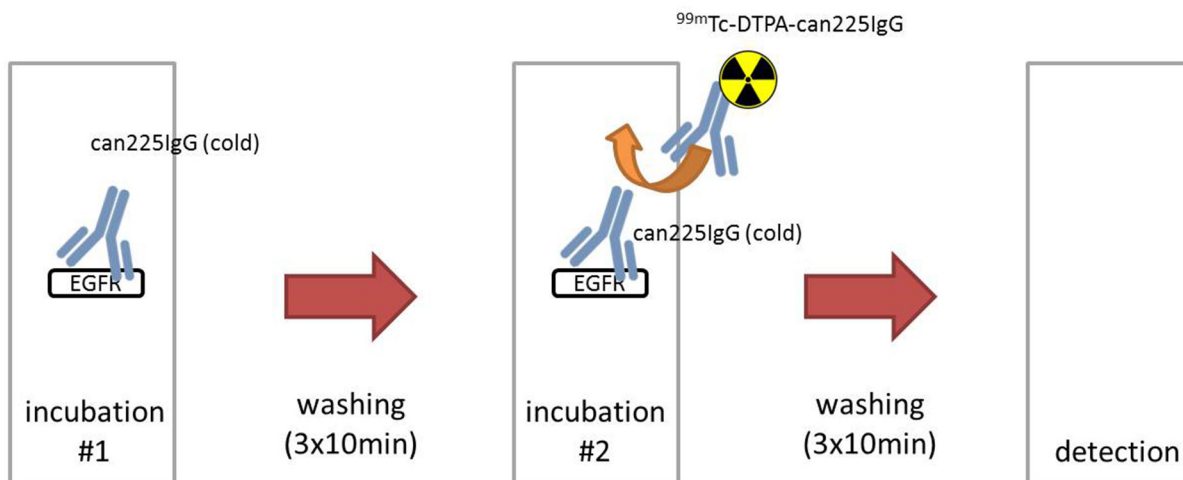

**Supplementary Figure 3: Schematic diagram of the radioblot blocking assay shown in Figure 2E.** In Figure 2E two identical blot membranes were loaded with EGFR, as depicted in row 1 and 2. 1.) The first membrane was incubated with <sup>99m</sup>Tc-DTPA-can225IgG, which bound to immobilized EGFR on the membrane, revealing a signal on the membrane. 2.) The second membrane was first incubated with cold (non-radioactive and non-functionalized) can225IgG at a high concentration (10µg/ml), which bound to immobilized EGFR and saturated all available epitopes. Following a washing step to remove unbound can225IgG, the membrane was again incubated, this time with <sup>99m</sup>Tc-DTPA-can225IgG. If no signal is obtained upon incubation with <sup>99m</sup>Tc-DTPA-can225IgG, its non-specific binding can be excluded.

Supplementary Table 1: Coding sequence of soluble canine EGFR

| Feature                                                                                    | Sequence                                                                                                                                                                                                                                                                                                                                                                                                                                                                                                                                                                                                                                                                                                                                                                                                                                                                                                                                                                                                                                                                                                                                                                                                                                                                                                                                                                                                                                                                                                                                                                                                                                                                                                                                                                                                                                                                                                                                                                                                                                                                                                                                                                                                                                                                                                                                                                                                                                                                                                                                                                                                                                                                                                                                                                                                                                                                                                                                                                                                                                                                                                                                                                                                                                                                                                                                                                                                                                                                                                                                             |
|--------------------------------------------------------------------------------------------|------------------------------------------------------------------------------------------------------------------------------------------------------------------------------------------------------------------------------------------------------------------------------------------------------------------------------------------------------------------------------------------------------------------------------------------------------------------------------------------------------------------------------------------------------------------------------------------------------------------------------------------------------------------------------------------------------------------------------------------------------------------------------------------------------------------------------------------------------------------------------------------------------------------------------------------------------------------------------------------------------------------------------------------------------------------------------------------------------------------------------------------------------------------------------------------------------------------------------------------------------------------------------------------------------------------------------------------------------------------------------------------------------------------------------------------------------------------------------------------------------------------------------------------------------------------------------------------------------------------------------------------------------------------------------------------------------------------------------------------------------------------------------------------------------------------------------------------------------------------------------------------------------------------------------------------------------------------------------------------------------------------------------------------------------------------------------------------------------------------------------------------------------------------------------------------------------------------------------------------------------------------------------------------------------------------------------------------------------------------------------------------------------------------------------------------------------------------------------------------------------------------------------------------------------------------------------------------------------------------------------------------------------------------------------------------------------------------------------------------------------------------------------------------------------------------------------------------------------------------------------------------------------------------------------------------------------------------------------------------------------------------------------------------------------------------------------------------------------------------------------------------------------------------------------------------------------------------------------------------------------------------------------------------------------------------------------------------------------------------------------------------------------------------------------------------------------------------------------------------------------------------------------------------------------|
| <b>Human EGFR leader</b><br><b>Soluble canine EGFR (aa 1-618)</b><br><b>6xHIS tag STOP</b> | <p> <span style="color: green;">ATGAGGCCTTCTGGAACAGCCGGCGCTGCTCTGCTGGCACTGCTGGCTGCTCTGT</span><br/> <span style="color: black;">GCCCTGCCTCTAGAGCCATGGCCGTGTGTCAAGGGCACCAGCAACAGACTGACACA</span><br/> <span style="color: black;">GCTGGGAACCTTCGAGGACCACTTCCTGAGCCTGCAGCGGATGTTCAACAACCTGC</span><br/> <span style="color: black;">GAGGTGGTGTCTGGGCAACCTGGAATCACCTACATGCAGCGGAACTACGACCTGA</span><br/> <span style="color: black;">GCTTCCTGAAAACCATCCAGGAAGTGGCCGGCTACGTGCTGATCGCCCTGAACAC</span><br/> <span style="color: black;">CGTGGAAAAGATCCCCCTGGAAAACCTGCAGATCATCCGGGGCAACGTGCTGTAC</span><br/> <span style="color: black;">GAGAACACCCACGCCCTGAGCGTGTGAGCAACTACGGCAGCAACAAGACCGGCC</span><br/> <span style="color: black;">TGCAGGAACCTGCCCTGCGGAACCTGCACGAGATTCTGCAGGGCGCCGTGCGGTT</span><br/> <span style="color: black;">CAGCAACAACCCCGTGTGTGCAATGTGGAAACAATCCAGTGGCGGGACATCGTG</span><br/> <span style="color: black;">GACAACGACTTCATCAGCAACATGAGCATGGACATCCAGAACCAGGCCGGCAGAT</span><br/> <span style="color: black;">GCCAGAAGTGCACCCAGCTGTCCCAACGGCTCTTGTGGGGCCCTGGCAAAGA</span><br/> <span style="color: black;">GAACTGCCAGAAGCTGACCAAGATCATCTGCGCCAGCAGTGTAGCGGCCGGTGC</span><br/> <span style="color: black;">AGAGGCAGAAGCCCTAGCGACTGCTGCCACAACCAGTGTGCCGCCGGATGTACCG</span><br/> <span style="color: black;">GCCCCAGAGAAAGCGATTGCCTCGTGTGCCGGAAGTCCGGGACGAGGCCACATG</span><br/> <span style="color: black;">CAAGGATACCTGCCCCCTCTGATGCTGTACAACCCACCACCTACCAGATGGAC</span><br/> <span style="color: black;">GTGAACCCCGAGGGCAAGTACAGCTTCGGCGCCACCTGTGTGAAGAAGTGGCCCA</span><br/> <span style="color: black;">GAAACTACGTCTGTGACCGACCACGGCAGCTGCGTGCAGGGCCTGTAGCAGCGATAG</span><br/> <span style="color: black;">CTACGAGGTGGAAGAGGACGGCGTGCAGGAAGTGAAGAAATGCGAGGGCCCTGC</span><br/> <span style="color: black;">CGGAAAGTGTGCAACGGCATCGGCATCGGAGAGTTCAAGGACACCCTGAGCATCA</span><br/> <span style="color: black;">ACGCCACCAACATCAAGCACTTCAAGAACTGCACCAGCATCAGCGGCGACCTGCA</span><br/> <span style="color: black;">CATCCTGCCCCGTGGCCTTTAGAGGCGACAGCTTCACCCACACCCTGCCCCGGAC</span><br/> <span style="color: black;">CCCAAAGAGCTGGACATTCTGAAAACCGTGAAAGAGATTACCGGCTTCTGTGTA</span><br/> <span style="color: black;">TTCAGGCCTGGCCCGAGAACCGGACAGACCTGCACGCCTTCGAGAATCTGGAAAT</span><br/> <span style="color: black;">TATCAGAGGCCGGACCAAGCAGCACGGCCAGTTTTCTCTGGCCGTCGTGGGCCTG</span><br/> <span style="color: black;">AACATCACCAGCCTGGGCCTGCGGAGCCTGAAAGAAATCAGCGACGGCGACGTGA</span><br/> <span style="color: black;">TCATCTCCGGCAACCGGAAGCTGTGCTACGCCAACACCATCAACTGGAAGAAGCT</span><br/> <span style="color: black;">GTTCCGGCACCAGCTCCCAGAAAACAAAGATCATCAACAACAAGGACGAGAAGGCC</span><br/> <span style="color: black;">TGCAAGGCCATCGGCCACGTGTGCCACCCTCTGTGTAGCTCCGAGGGCTGTTGGG</span><br/> <span style="color: black;">GACCCGGCCCTAGAGATTGCGTGTCTGCAGAAACGTGTCCCGGGGCAAAGAATG</span><br/> <span style="color: black;">TGTGGAAAAGTGCAACATCCTGGAAGGCGAGCCCCGCGAGTTCGTGGAAAACAGC</span><br/> <span style="color: black;">GAGTGCATCCAGTGCCACCCCGAGTGTCTGCCCCAGGCCATGAACATTACCTGTA</span><br/> <span style="color: black;">CCGGCAGAGGCCCGACAGCTGCATCAAGTGCGCCACTACATCGACGGCCCCCA</span><br/> <span style="color: black;">CTGCGTGAAAACCTGTCTGCGGCATCATGGGCGAGAAACAACACCCTCGTGTGG</span><br/> <span style="color: black;">AAGTTCTCCGACGGCAGCCGGATGTGTACCTGTGCCATCCCAACTGCACCTACG</span><br/> <span style="color: black;">GCTGTGAAGGCCCGGACTGGAAGGCTGTGCCAAGCCTGGACCCAAGATCCCCAG</span><br/> <span style="color: blue;">CCACCACCACCATCACCCTGA</span> </p> |

Color coding: green – leader sequence of human EGFR; black – coding sequence for expression of soluble canine EGFR; blue – 6x HIS-tag; red – stop codon

**Supplementary Table 2: Patients' characteristics of serum stability samples**

| Patient # | Breed           | Age   | Sex         | Disease           | ICD-10 | Specific tumor type/<br>histopathology | Grade | Stage |
|-----------|-----------------|-------|-------------|-------------------|--------|----------------------------------------|-------|-------|
| 1         | german pinscher | 11y7m | f, neutered | mammary carcinoma | C 80   | complex tubulopapillary carcinoma      | I     | I     |
| 2         | mixed breed     | 11y7m | f, neutered | mammary carcinoma | C 80   | simple solide carcinoma                | II    | II    |
| 3         | cocker spaniel  | 10y   | f           | mammary carcinoma | C 80   | simple tubulopapillary carcinoma       | I     | I     |
| 4         | border collie   | n.a.  | f           | mammary carcinoma | C 80   | simple tubulopapillary carcinoma       | I     | II    |

Y – year, m – month, f – female, n.a. – no data available

**Supplementary Table 3: Patients' characteristics of autoradiography sections**

| Sample letter | Breed           | Age   | Sex         | Disease           | ICD-10 | Specific tumor type/<br>histopathology | Grade | Stage |
|---------------|-----------------|-------|-------------|-------------------|--------|----------------------------------------|-------|-------|
| A             | German shepherd | 12y6m | f, neutered | mammary carcinoma | C 80   | solid to tubular                       | n.a.  | n.a.  |
| B             | poodle          | 9y11m | f, neutered | mammary carcinoma | C 80   | tumor with focal cystic cavities       | n.a.  | n.a.  |
| C             | border terrier  | 11y3m | f           | mammary carcinoma | C 80   | scirrhous                              | n.a.  | n.a.  |

Y – year, m – month, f – female, n.a. – no data available
